# Supplementary material for: Genomic Analysis Reveals Distinct Concentration-Dependent Evolutionary Trajectories for Antibiotic Resistance in Escherichia coli
Source: DNA Res. 2014 Oct 3;21(6):711–26. doi: 10.1093/dnares/dsu032 (PMC4263303; doi:10.1093/dnares/dsu032)
Supplement: Supplementary Data [file supp_dsu032_dsu032supp.pdf]

# **Genomic Analysis Reveals Distinct Concentration-Dependent Evolutionary Trajectories for Antibiotic Resistance in *Escherichia coli***

Aalap Mogre, Titas Sengupta, Reshma TV, Preethi Ravi, Aswin Sai Narain Seshasayee

National Centre for Biological Sciences, Tata Institute of Fundamental Research, GKVK, Bellary Road, Bangalore, 560065, Karnataka, India

## **Supplementary Figure Details**

**Figure S1:****Overview of the evolution experiment.**

The flowchart describes the evolution experiment carried out in two sublethal concentrations of kanamycin (4-kan: 4 µg/ml kanamycin, and 8-kan: 8 µg/ml kanamycin). P0, P1, etc. describe batch transfers of cultures every 24 hours into fresh medium as is depicted in the inset figure (lower left side). Light blue boxes indicate deep sequencing of gDNA extracted from entire evolving populations, whereas the darker blue boxes indicate deep sequencing of gDNA extracted from isolates obtained from the evolving populations. Green boxes indicate less costly mutants, whereas red boxes indicate costly mutants.

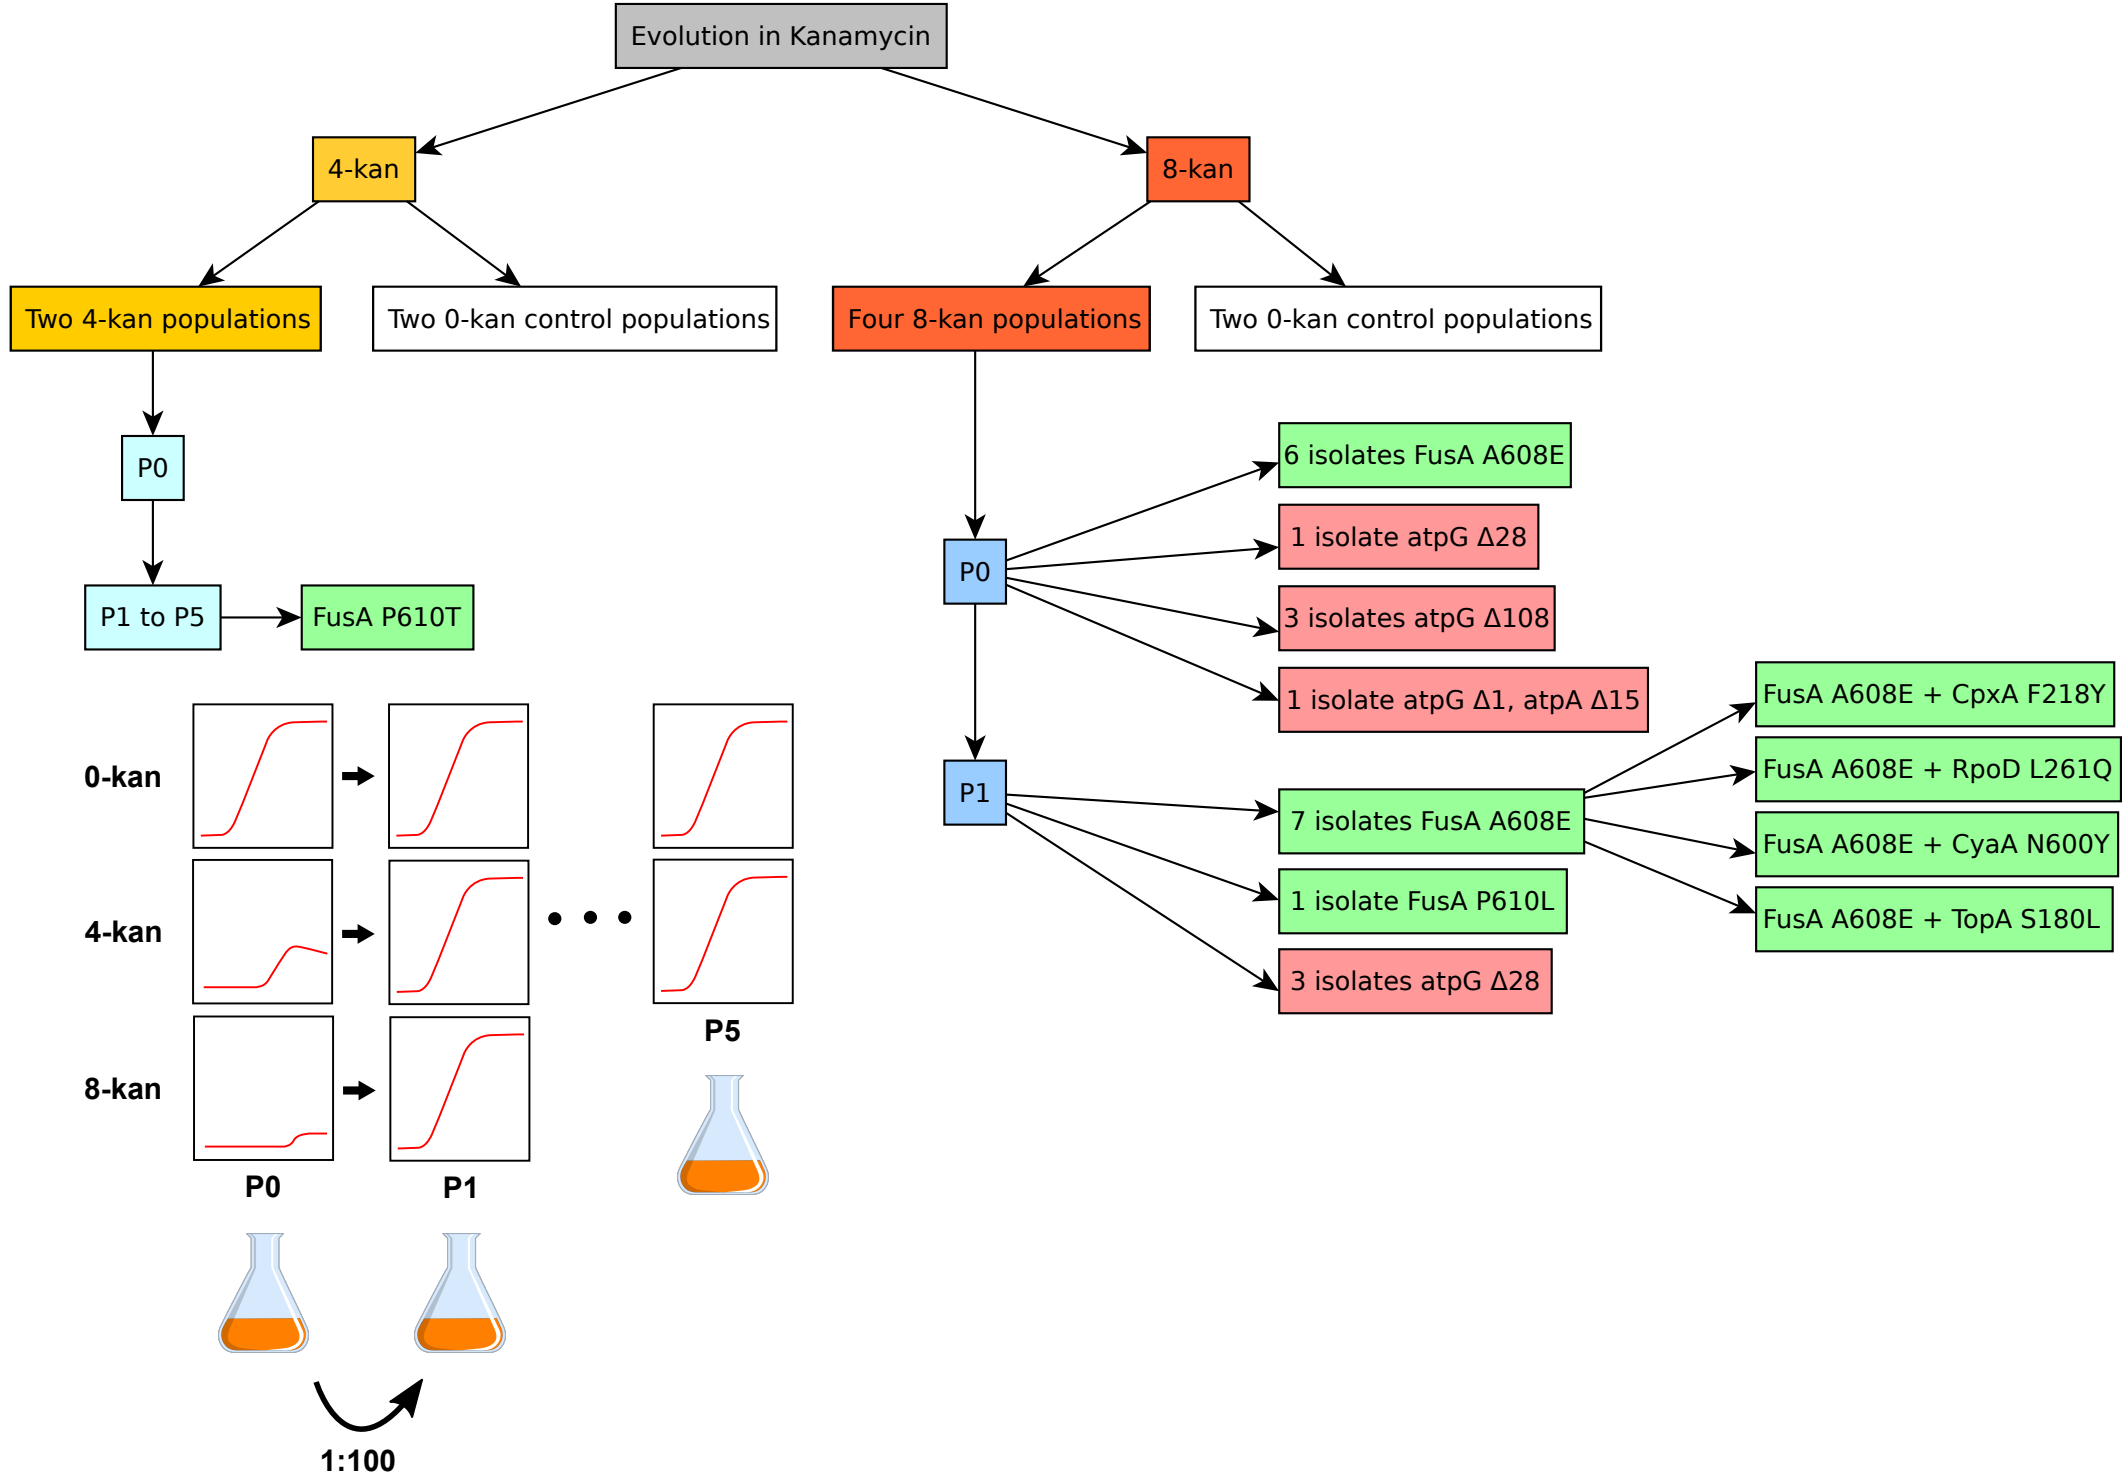

**Figure S2:**

***Wildtype* MIC levels.**

(A) MIC curve of kanamycin for *wildtype* *E. coli* MG1655 with the sub-lethal range represented by the red gradient. The two concentrations ~25% and ~50% of the lethal level selected for the evolution experiments are indicated by the blue boxes (error bars indicate standard deviation derived from OD<sub>600</sub> values of four technical replicates). MIC of *wildtype* *E. coli* is around 20 µg/ml (B) Since the AcrE<sup>R334L</sup> mutation was present in our *wildtype* populations, we determined the contribution of this mutation to kanamycin tolerance. Shown here are the kanamycin MICs for two isolates from our *wildtype* strain: one is *wildtype* for the gene (AcrE<sup>WT</sup>) and the other contained the AcrE<sup>R334L</sup> mutation (n = 8). These are 'distribution' representations by box plots. The box represents the interquartile range and the line within the box indicates the median value. The maximum and the minimum value (1.5 times the interquartile range), excluding the outliers, is represented by the whiskers. The points represent the outliers. The AcrE<sup>R334L</sup> mutation does not confer tolerance to kanamycin.

Figure 1 is a scatter plot showing the growth of *E. coli* strain 10090 in the presence of kanamycin. The y-axis represents the optical density at 600 nm (OD<sub>600</sub>), ranging from 0 to 0.8. The x-axis represents the concentration of kanamycin in µg/ml, ranging from 0 to 25. The background of the plot is color-coded: white for 0-4 µg/ml, light red for 4-8 µg/ml, and red for 8-25 µg/ml. Two blue vertical rectangles highlight the 4-5 µg/ml and 7-8 µg/ml ranges. Data points with error bars show a decrease in OD<sub>600</sub> as kanamycin concentration increases.

| Kanamycin (µg/ml) | OD <sub>600</sub> |
|-------------------|-------------------|
| 0                 | 0.75              |
| 2                 | 0.25              |
| 4                 | 0.18              |
| 6                 | 0.16              |
| 8                 | 0.10              |
| 10                | 0.06              |
| 12                | 0.05              |
| 14                | 0.03              |
| 16                | 0.03              |
| 18                | 0.01              |
| 20                | 0.01              |
| 22                | 0.00              |
| 24                | 0.00              |

Box plot showing the MIC of Kanamycin (µg/ml) for AcrE WT and AcrE R334L. The y-axis ranges from 0 to 100. AcrE WT has a median MIC of approximately 25 µg/ml, while AcrE R334L has a median MIC of approximately 20 µg/ml and an outlier at approximately 30 µg/ml.

| Strain     | Median MIC (µg/ml) | Q1 (µg/ml) | Q3 (µg/ml) | Outliers (µg/ml) |
|------------|--------------------|------------|------------|------------------|
| AcrE WT    | 25                 | 20         | 30         | None             |
| AcrE R334L | 20                 | 20         | 20         | 30               |

**Figure S3:****Growth in 4 and 8-kan.**

(A) Growth curves of *E. coli* MG1655 in 0-kan, 4-kan and 8-kan. These are results from around 94 replicates (0-kan) and 88 replicates (4 & 8-kan) of the parent population grown in a 96-well plate. (B) Growth parameters of the 4-kan and 8-kan populations: duration of lag phase, maximum growth rates and the stationary phase OD<sub>600</sub>. Growth rates were calculated as  $d(\ln OD)/dt$ , and the maximal value was taken as the maximum growth rate. While growth rates and stationary phase OD<sub>600</sub> are lower, the duration of lag phase is higher in the presence of kanamycin on average (p-values obtained from Welch's t-test, for any pairwise comparison is  $< 10^{-16}$ ). These are 'distribution' representations by box plots. The box represents the interquartile range and the line within the box indicates the median value. The maximum and the minimum value (1.5 times the interquartile range), excluding the outliers, is represented by the whiskers. The points represent the outliers. Since these growth measurements were carried out in 96-well plates, growth parameters reported here will be different from those obtained from growth measurements in flasks.

**A**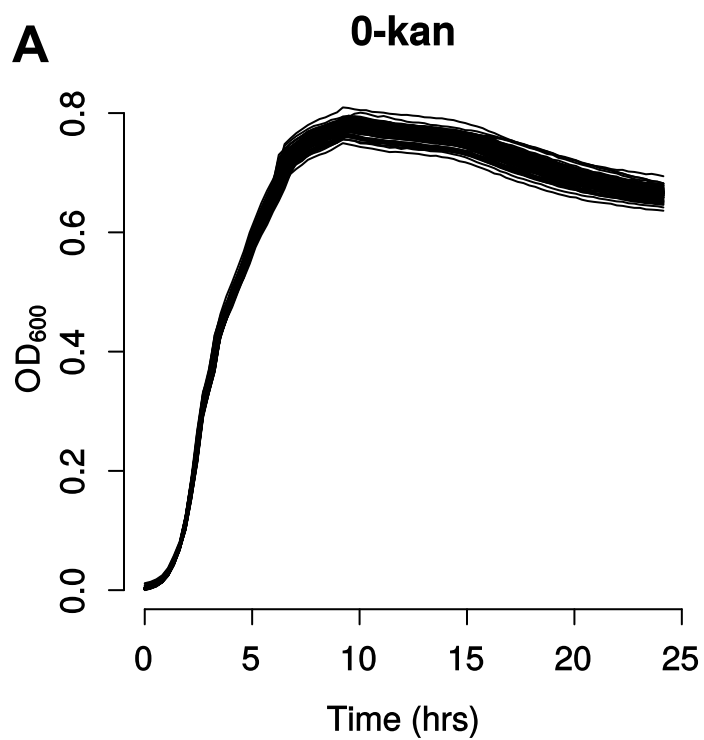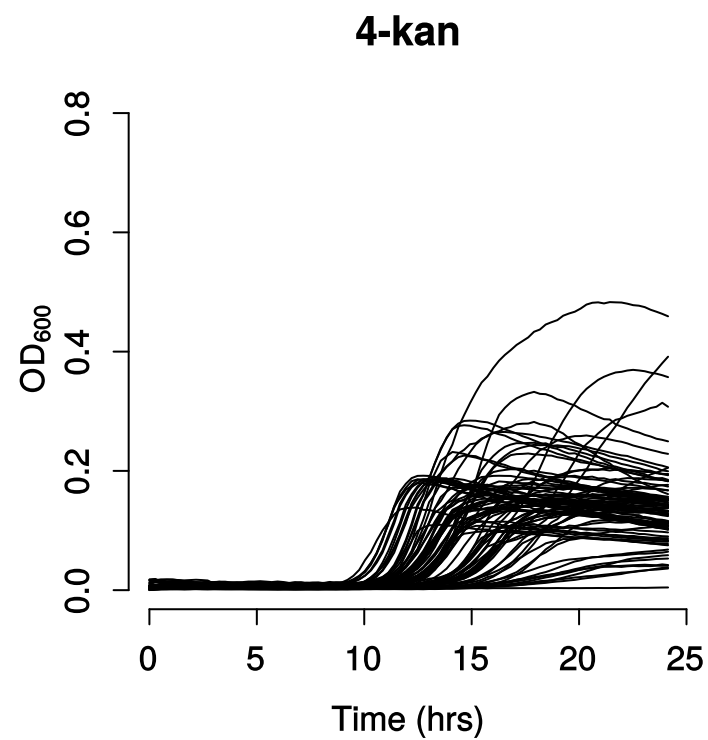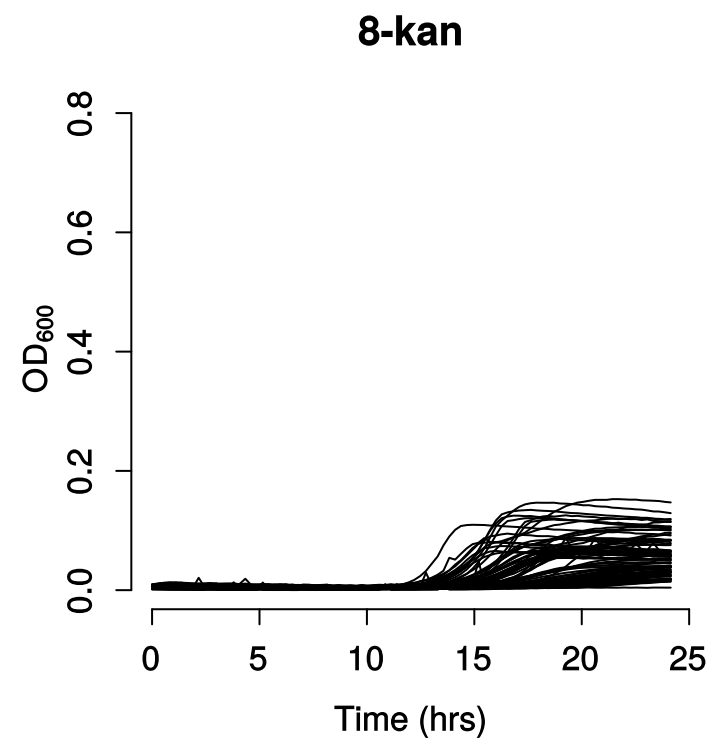**B**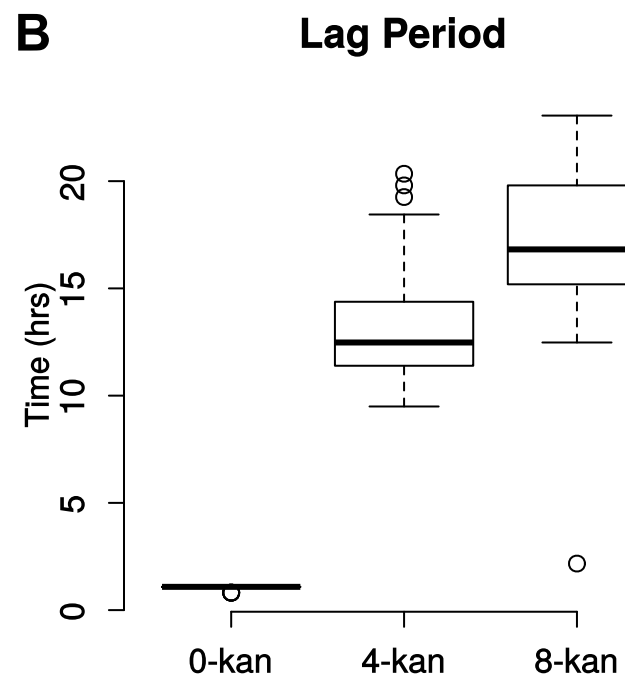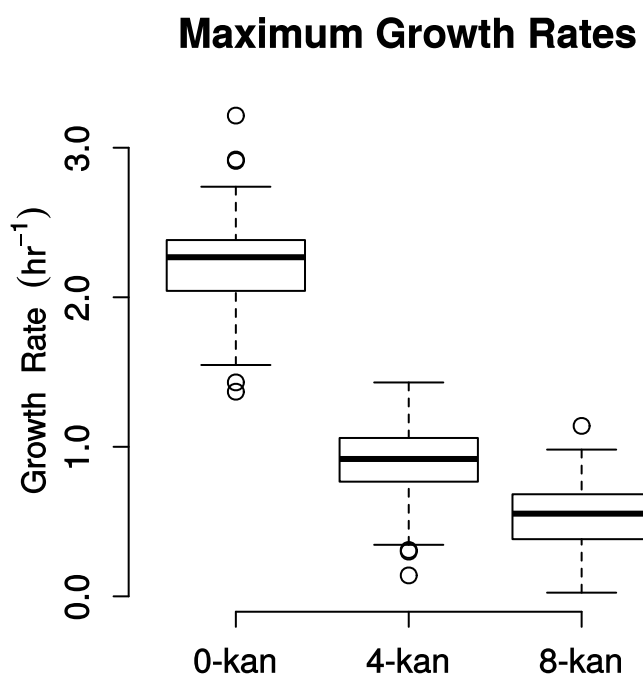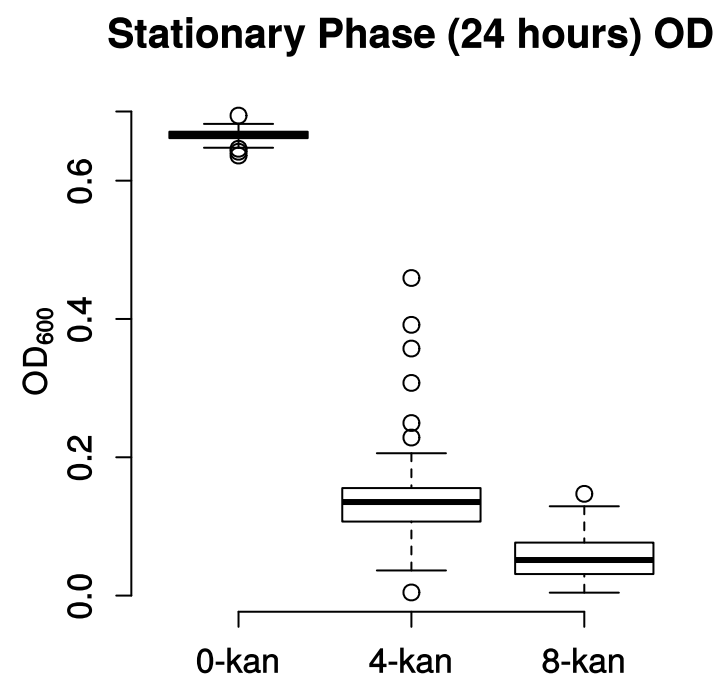

**Figure S4:****MICs of evolving populations:**

Population optical densities ( $OD_{600}$ ) (A) and MICs (B) for an additional set of evolution experiments. 0,4 and 8-kan indicate that the cultures were grown in 0, 4 and 8  $\mu\text{g/ml}$  of kanamycin. P0 and P1 indicate batch transfers of cultures. Different shades of grey represent different replicate populations evolved in parallel. Two control populations were maintained under 0-kan conditions, whereas four populations were maintained under 4 and 8-kan conditions in a 24 well plate (1ml).

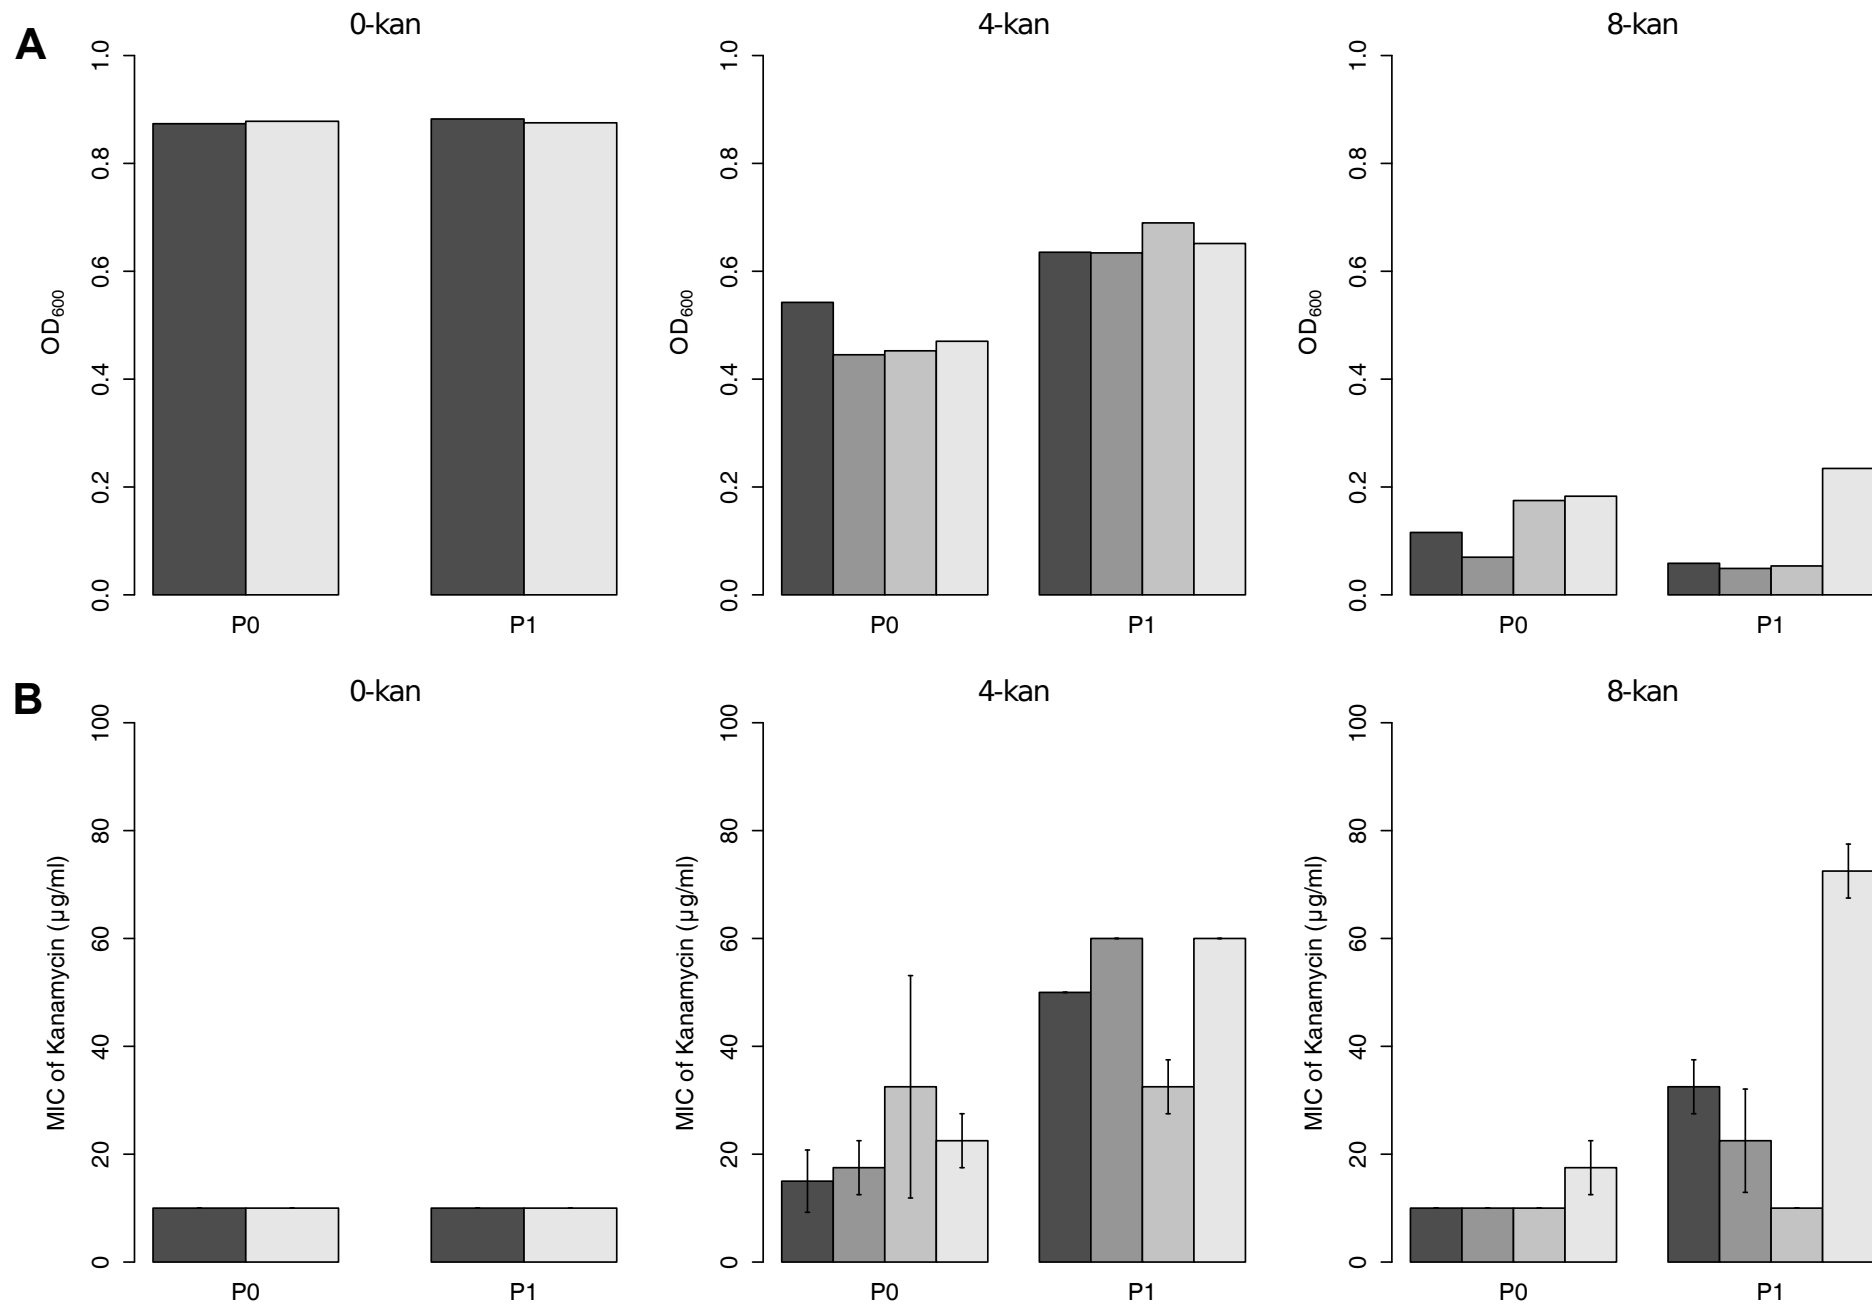

**Figure S5:**

**Population structure of evolving populations (part I).**

(A-C) One trial, (D-F) another trial: growth characteristics of colonies derived from evolving and control populations, immediately after inoculation (0hr), in stationary phase (24hrs) and after the first passage (P1; indicated on the right) in medium with and without kanamycin (indicated on the top). Growth in plain LB is represented on the x-axis while growth in either 4-kan or 8-kan is represented on the Y-axis, both in terms of 24 hour OD<sub>600</sub>. Blue box highlights the time-point where a difference in the evolving populations between the two different concentrations is evident. At this time-point the 8-kan populations are comprised of multiple sub-populations (sub-grouped based on their ability to tolerate kanamycin and their fitness in the absence of kanamycin). Note that the left panel in (C) 24 hours is identical to Figure 2B inset.

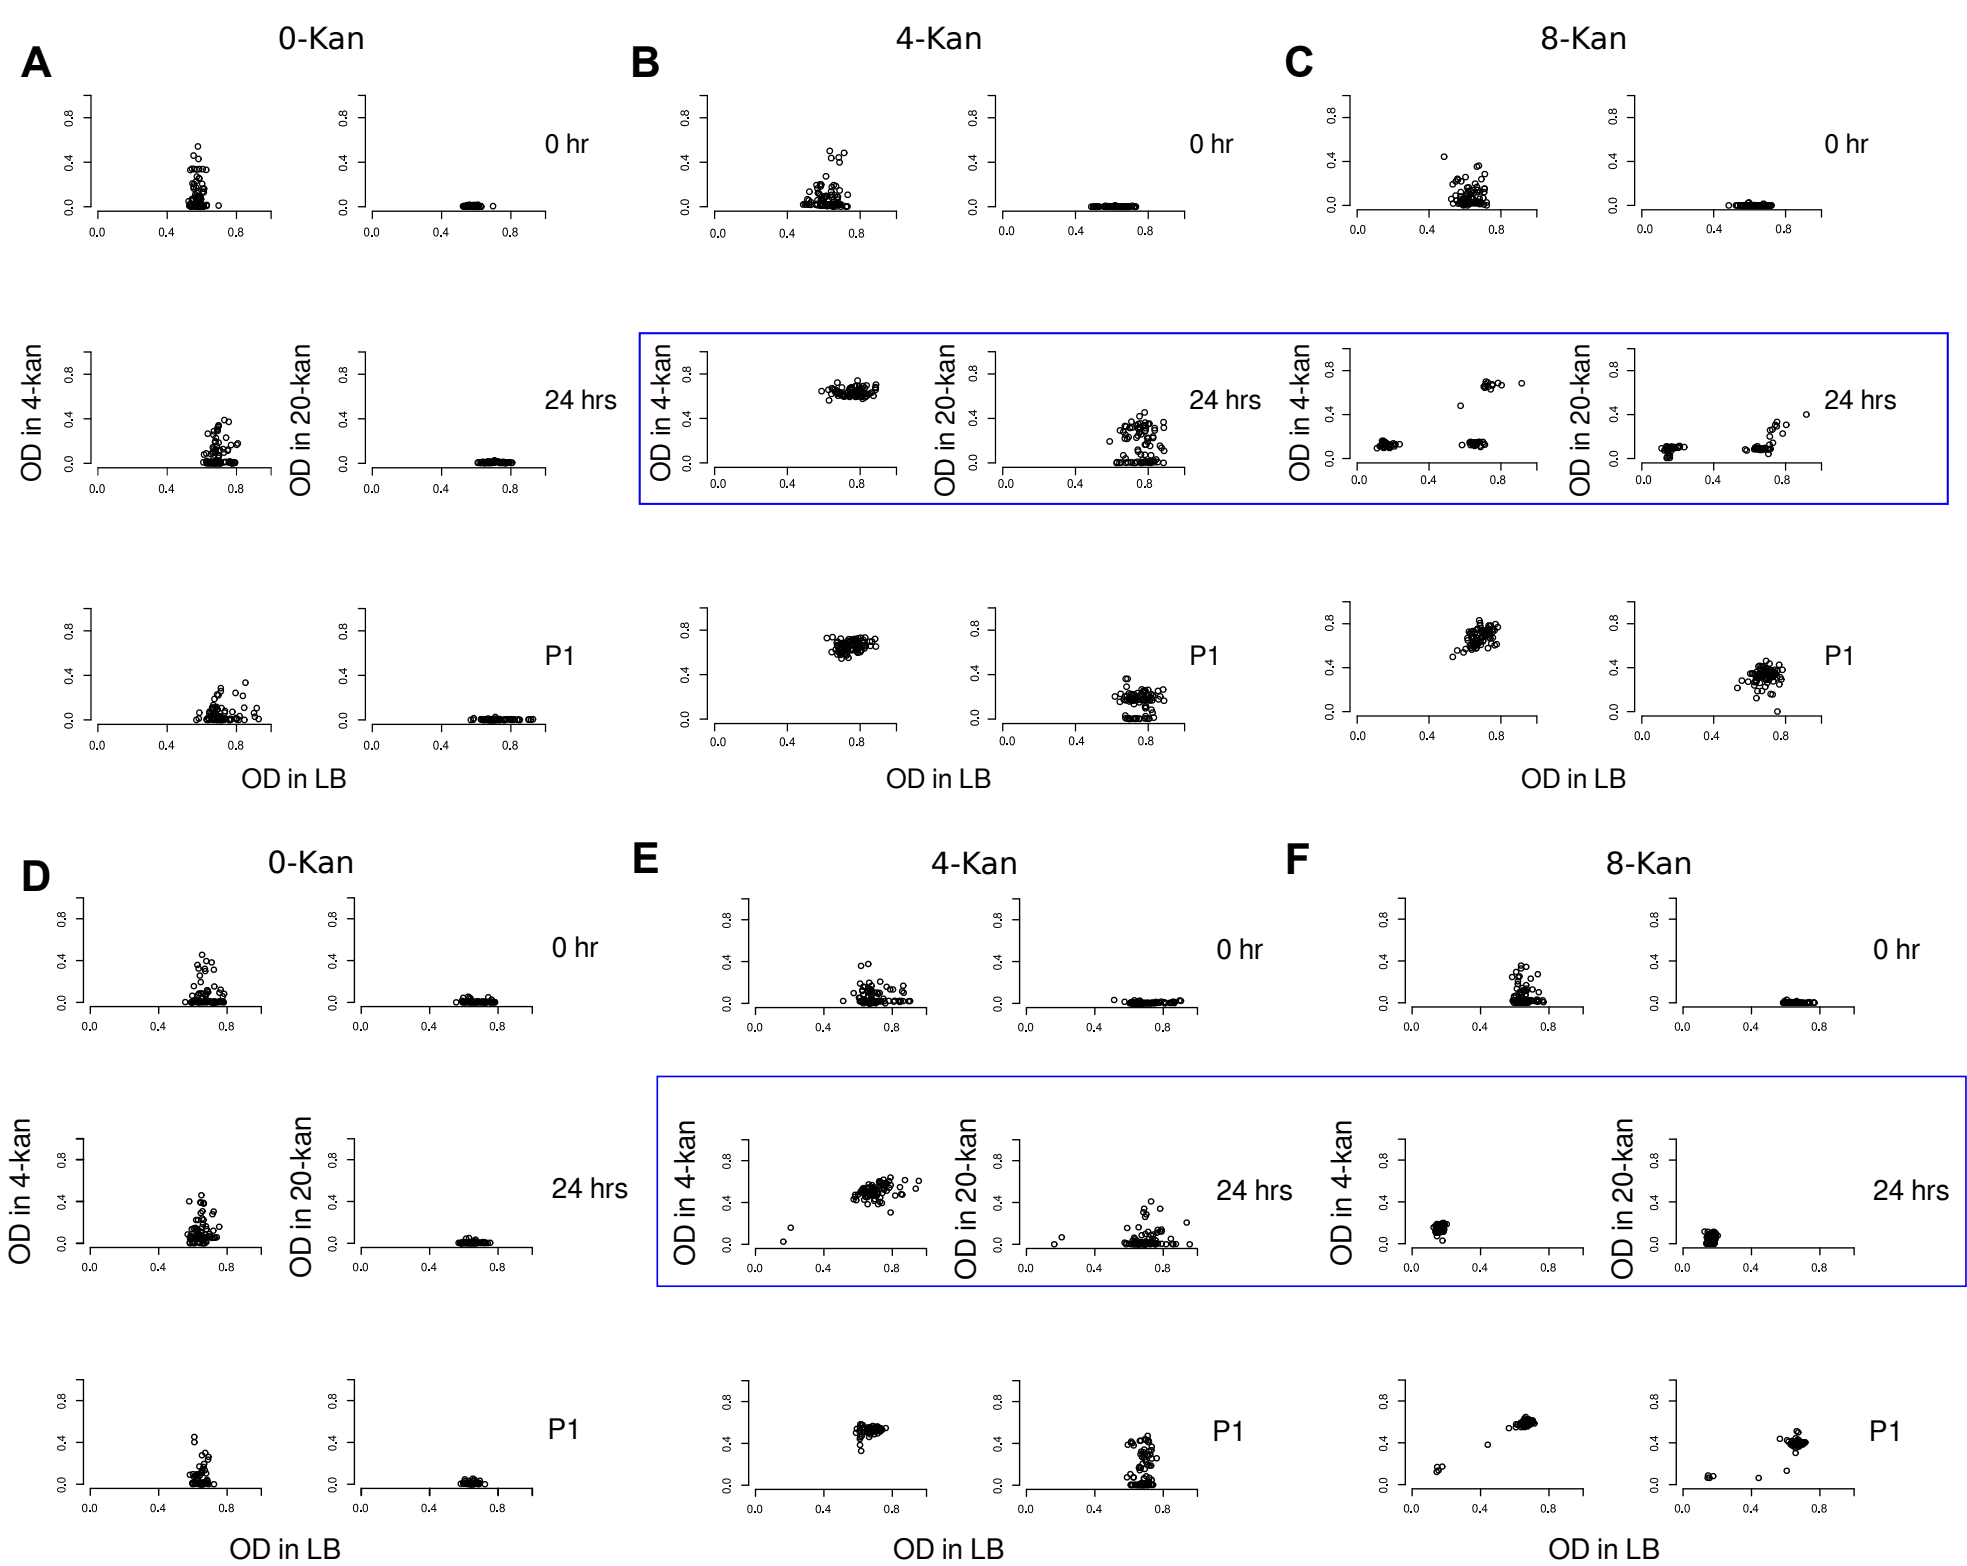

## **Figure S6**

### **Schematic representation of growth simulation**

The simulation, described in the Methods, involves tracking the sizes of three types of arrays (or hashes in this case, as the simulation code was written in PERL), each representing one type of bacterium. At each iteration, the sizes of the arrays increases depending in the probability of each member of the array doubling during that iteration. This set of probabilities are the primary parameters of the model. The initial size of the population was set to 10,000, with 1% of the cells being the fit mutants, 5% being the sick mutants and the remaining 94% being wildtype.

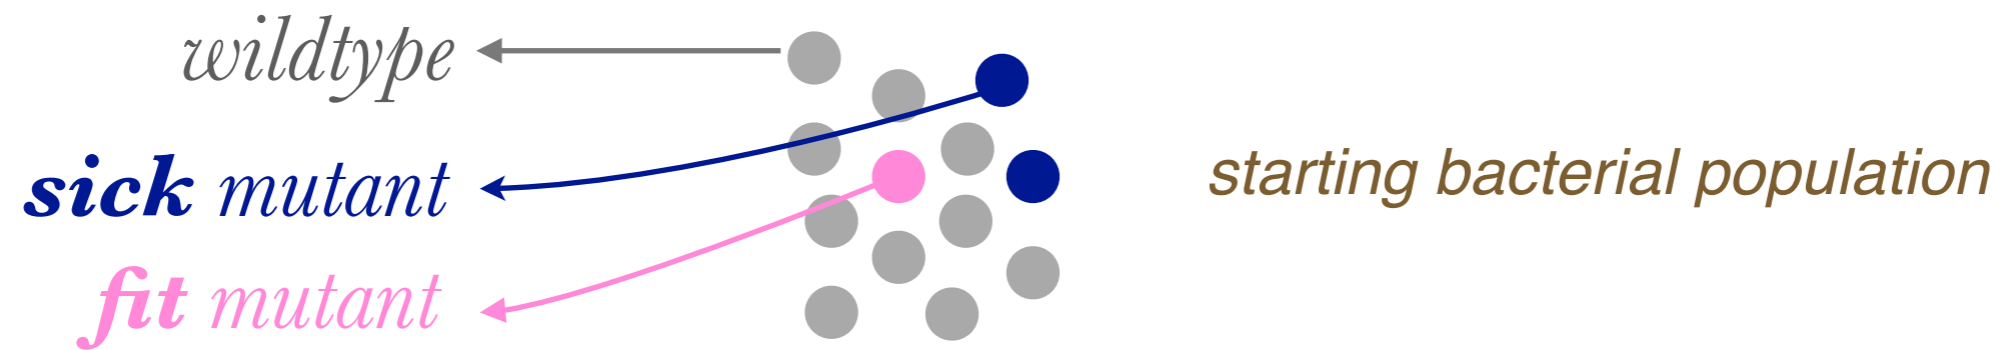

Probabilistic simulation  
(N iterations / time-steps)

$$\mu_{wild} \ll \mu_{sick} \ll \mu_{fit}$$

These numbers are probabilities of a  
cell dividing every time-step

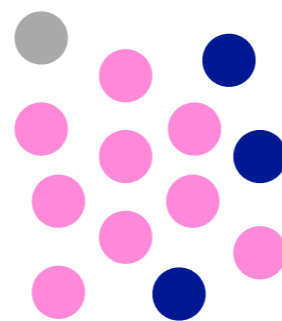

resulting bacterial population  
calculate #sick / #fit

**Figure S7:****Population structure of evolving populations (part II).**

(A) Results of the two trials represented as boxplots of the ratios of OD<sub>600</sub> in 20-kan to OD<sub>600</sub> in 4-kan for isolates falling into the three groups (see inset, Figure 2B, 8-kan 1). Data for the three types of isolates from stationary phase 4-kan and 8-kan populations are plotted. The three group types are represented by different shades of grey (see inset copied from Figure 2B for definition of groups) and the populations that they were derived from are indicated on the x-axis. The two different replicates are indicated above. For simplicity, groups are excluded if isolates of that type weren't picked up. Shown here are 'distribution' representations by box plots. The box represents the interquartile range and the line within the box indicates the median value. The maximum and the minimum value (1.5 times the interquartile range), excluding the outliers, is represented by the whiskers. The points represent the outliers. As the ability to grow in 20-kan equals the ability to grow in 4-kan, as it does for the group-1 colonies (which are most likely ATP synthase mutants), the mean in the box plot of ratios should approach 1. While if the ability to grow in 20-kan declines sharply with respect to growth in 4-kan, then the mean in the box-plots should decrease as it does for the group-3 colonies – although these are fit, tolerant mutants with a higher MIC.

# 24 hrs (Trial 1)

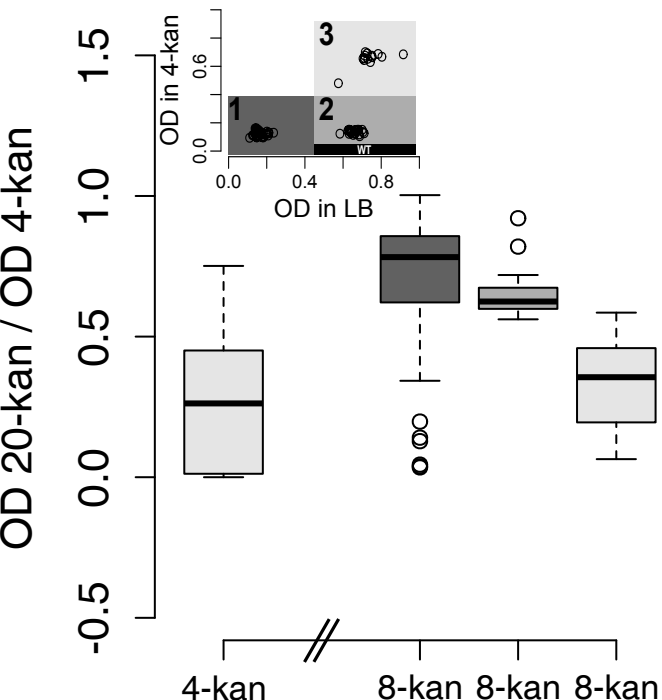

# 24 hrs (Trial 2)

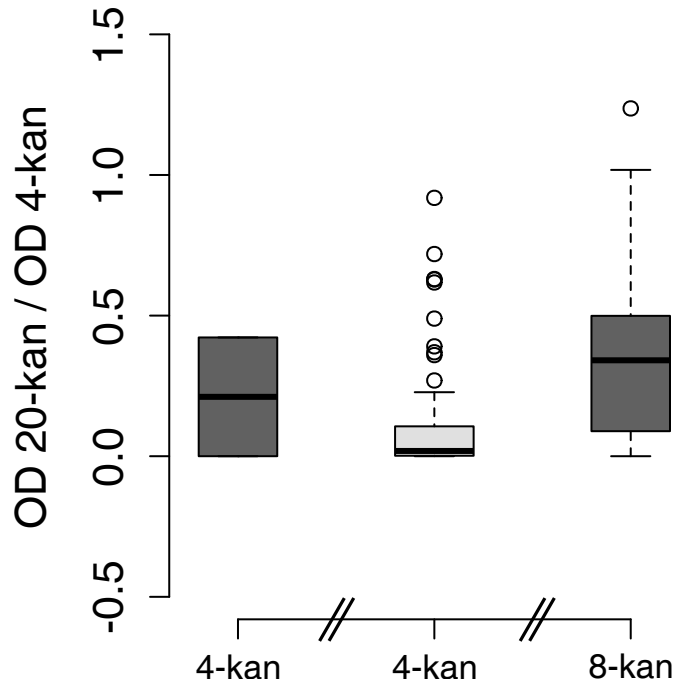

**Figure S8:**

**Analysis of isolates, derived from the third passage of 4-kan populations, containing the *rho/wecA* G>T intergenic region (IGR) mutation.**

(A) Presence (red)/ absence (black) heatmaps of mutations in isolates, derived from the two replicates of 4-kan populations in the third passage, confirmed by Sanger sequencing. Isolates are represented along the horizontal axis and mutations along the vertical axis. Isolates 2 and 4 also have the *rho/wecA* IGR mutation. In the first replicate the mutation in *acrE* does not fix (Figure 3A). This can be seen here as well. Also from the Sanger sequencing of the isolates, since the *FusA*<sup>P610T</sup> mutation is present in both backgrounds, i.e. isolates with or without the mutation in *acrE*, this scenario suggests that the *FusA*<sup>P610T</sup> mutation appeared independently in both backgrounds and explains the maintenance of *AcrE*<sup>R334L</sup> levels in the first replicate. (B) Kanamycin MIC boxplots (n=8) for the 10 isolates (MICs of WT-FRT and isolate 1 are copied from Figure 3B). These are 'distribution' representations by box plots. The box represents the interquartile range and the line within the box indicates the median value. The maximum and the minimum value (1.5 times the interquartile range), excluding the outliers, is represented by the whiskers. The points represent the outliers. (C) Kanamycin MIC curves for *wildtype* (black), *FusA*<sup>P610T</sup> (red), isolates 2 (green) and 4 (blue) with the IGR *rho/wecA* mutation present along with *FusA*<sup>P610T</sup>. These curves most likely imply that the *rho/wecA* mutation is another hitch-hiker and does not contribute to tolerance (error bars: standard deviation derived from OD<sub>600</sub> values of three technical replicates). (D) RT-PCR does not reveal a clear regulatory effect of the *rho/wecA* intergenic mutation on downstream genes. Relative C<sub>t</sub> values, of three genes downstream of the *rho/wecA* IGR mutation (*wecA*, *rffH* and *rffM*) and *ffh* a randomly picked gene elsewhere on the *E. coli* genome, for *FusA*<sup>P610T</sup> (FA) and *FusA*<sup>P610T</sup> + IGR *rho/wecA* mutant (RW). C<sub>t</sub> values are relative to those of 16S rRNA. Darker colours represent samples taken from mid-exponential (ME) phase and lighter colours represent stationary (S) phase samples. Black and green represent growths followed in plain LB whereas red and blue represent growth followed in 4-kan (error bars represent standard deviation of the combination of two biological replicates and their three technical replicates). The differences in the expression of these genes across the FA and RW strains is not significant regardless of the phase and the presence of kanamycin (although a difference does exist in expression in the presence versus absence of kanamycin within a strain). The inset shows the position of the three genes selected for analysis in the operon downstream the intergenic mutation. The following table shows fold change in relative (to 16S) C<sub>t</sub> values in the RR strain compared to FA (in absence of kanamycin):

| Fold change in C <sub>t</sub> values RR (vs FA) | <i>ffh</i> | <i>rfe</i> | <i>rffH</i> | <i>rffM</i> |
|-------------------------------------------------|------------|------------|-------------|-------------|
| ME                                              | 0.9979     | 1.0159     | 1.0027      | 0.9904      |
| S                                               | 1.0094     | 1.0021     | 1.0221      | 1.0397      |

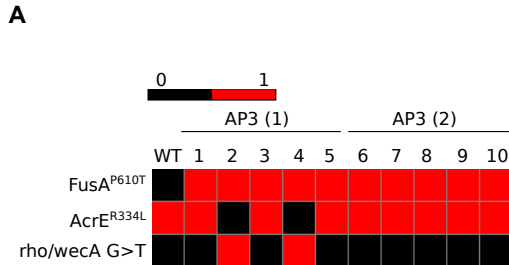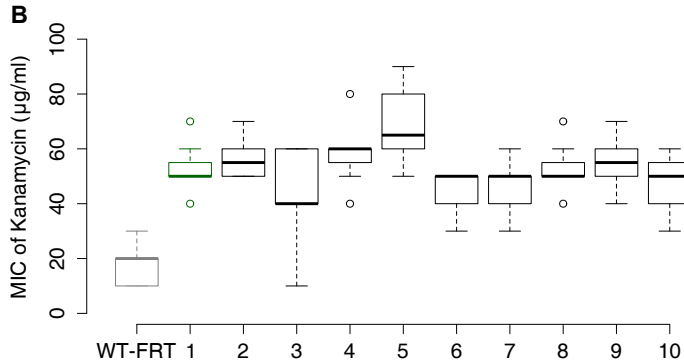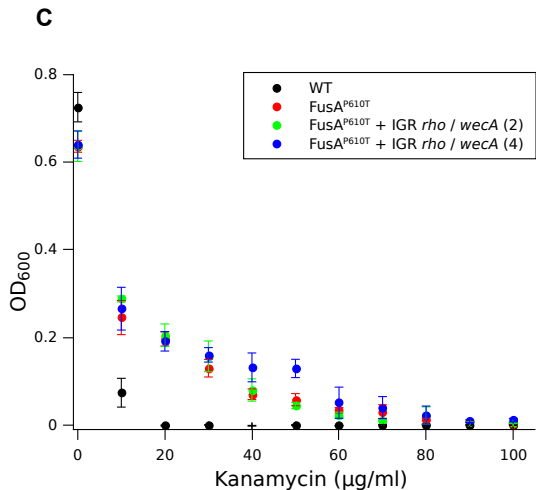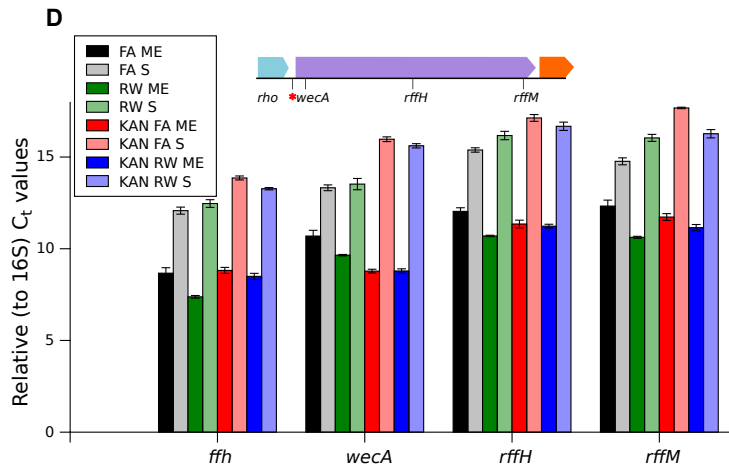

**Figure S9:**

**Location of the tolerance conferring mutations in EF-G.**

Protein feature view of EF-G from *Thermus thermophilus*, with the region at the end of domain IV highlighted with a blue box. The three mutations (FusA<sup>P610T</sup>, FusA<sup>P610L</sup> and FusA<sup>A608E</sup>) are in this region. The crystal structure of EF-G from *Thermus* (1EFG) is shown below the protein feature view with the residues corresponding to *E. coli* P610 and A608 highlighted with a blue circle and represented as spheres.

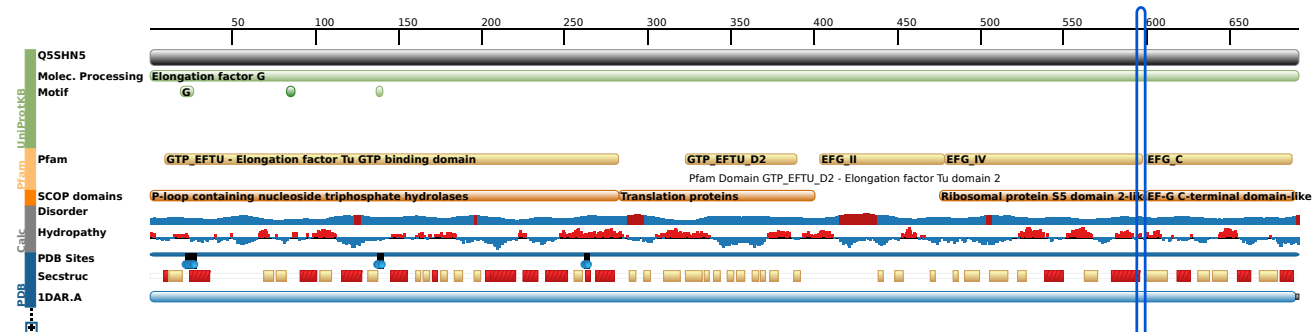

G597  
(*E. coli* A608)

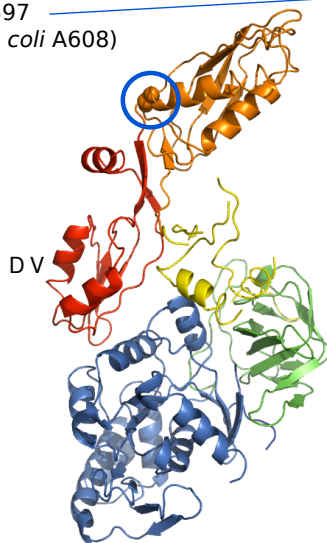

P599  
(*E. coli* P610)

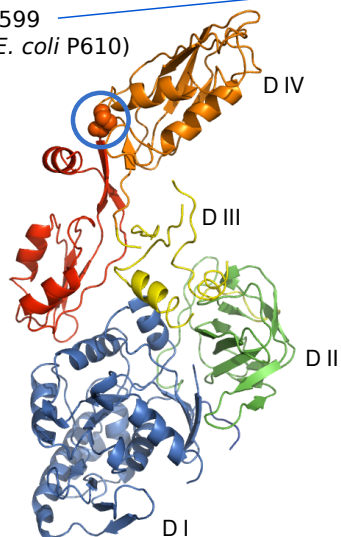

## Figure S10:

**The FusA<sup>P610T</sup> mutation confers tolerance to kanamycin without conferring a cost in the absence of the antibiotic (similar experiments in Figure 3).**

(A) Spotting of 10-fold dilutions of overnight grown wildtype (WT) and FusA<sup>P610T</sup>-FRT cultures on LB agar and LB agar containing 4, 15, 25 and 50-kan (indicated on the right). Temperature of incubation after spotting is indicated on the top along with the dilutions of the culture (UD represents undiluted culture and 1-7 represent serial 10-fold dilutions). The FusA<sup>P610T</sup> mutation confers tolerance, and does not adversely affect growth, even at higher temperatures. (B) Competition between the *wildtype* (without the FRT site near *fusA* as opposed to *wt::FRT* competed in Figure 3E) and FusA<sup>P610T</sup>-FRT strains. Bold colours represent the competition experiment, while the light colours represent the mock competition experiment where either strains were grown separately and mixed prior to plating. The FusA<sup>P610T</sup>-FRT strain can compete well even with the *wildtype* without the FRT site near the *fusA* gene. (C) Promoter activities (normalised to fall between 0 and 1) of P<sub>BAD</sub> promoter (GFP<sup>mut2</sup> induction) in WT-FRT versus FusA<sup>P610T</sup>-FRT for two different concentrations of inducer arabinose, (1mM – 1 Ara; 10mM – 10 Ara) and uninduced control (UI), in the presence of 10 µg/ml Kanamycin. The box represents time after induction where promoter activity peaks in the culture not treated with kanamycin (Figure 3F). Around OD<sub>600</sub> 0.5, along with the inducer, kanamycin to a final concentration of 10 µg/ml was also added (error bars indicate standard deviation for four replicates; for induction in absence of kanamycin see Figure 3F). Shown are time-points after addition of inducer and kanamycin. (D) Growth curves of the strains after addition of inducer arabinose in 0-kan (upper panel) and 10-kan (lower panel). Colour scheme used in (C) is retained in these plots. Only time-points after induction are shown. The box represents time after induction where promoter activity peaks in the culture not treated with kanamycin (Figure 3F).

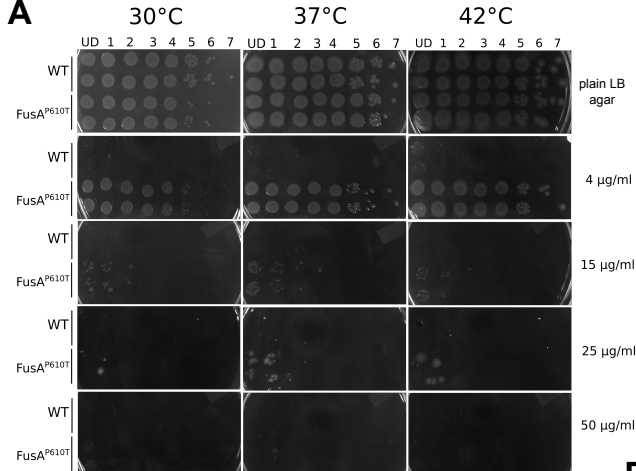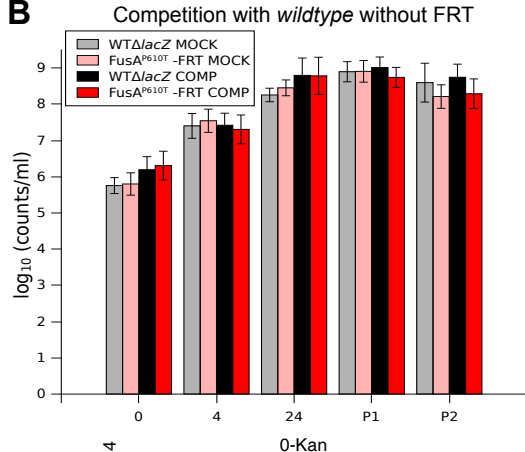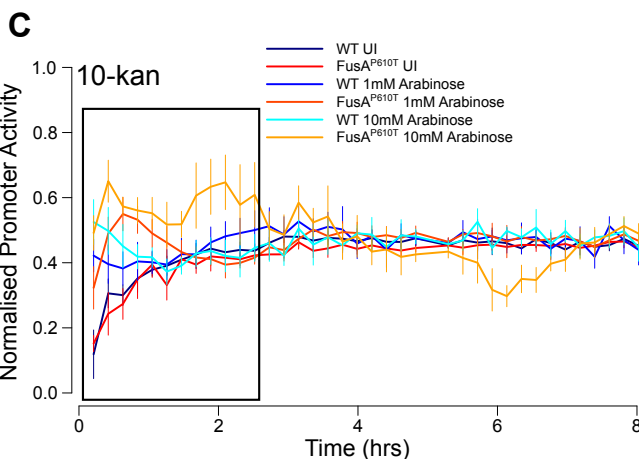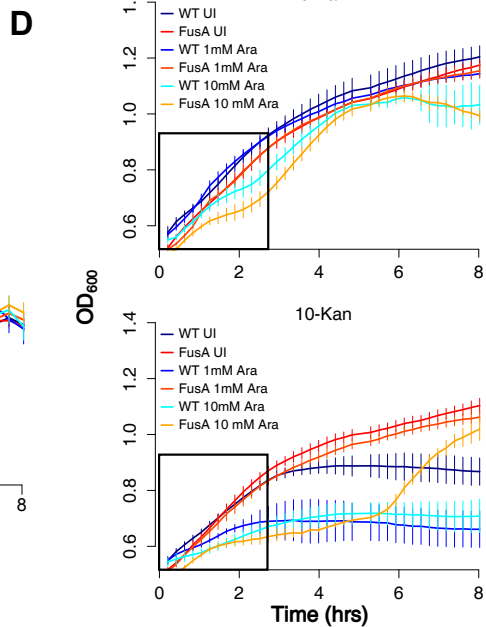

**Figure S11:**

**Location of tolerance conferring deletions in genes encoding subunits of the ATP synthase machinery.**

Protein feature view of *atpA* (A) and *atpG* (B). The amino acid sequence of the deleted regions is displayed above the protein feature view. The deleted regions are shown in red in the crystal structures on the right (3OAA.A and 3OAA.G). The deleted region shown in the crystal structure of *atpG* corresponds to the deletion length in the *atpG*Δ108bp mutation. (C) The deletions in *atpA* and *atpG* are both shown in red and are nearby in three-dimensional space.

WT SLPGNRYIALNLER  
*atpAΔ15bp* SLPGN-----LNLER  
 \*\*\*\*\*

A

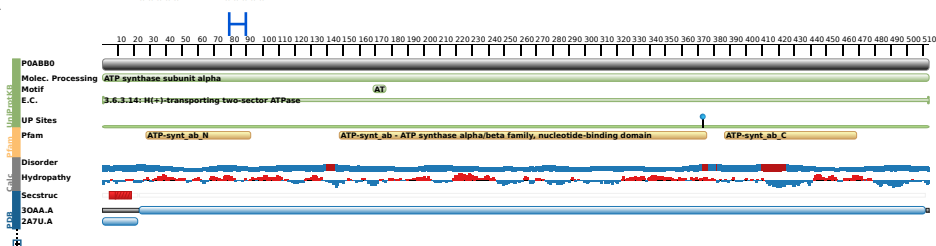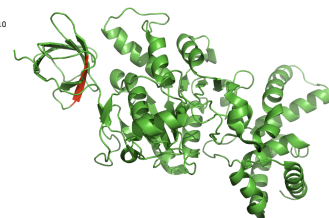

WT HKSWDYLYPEDPKALLDTLLRRYVESQVYQGVVENLASEQAARMVAMKAATDNGGSLIKELQLVYNKARQASITQELTEIVSGAAAV  
*atpGΔ1bp* HKSWDYLYPEDPKALLDTLLRRYVESQVYQGVVENLASEQAPVWVR  
*atpGΔ28bp* HKSWDYLYPEDPKALLDTLLRRYVESQVYQGVVENLASEQAARMVA-----  
*atpGΔ108bp* HKSWDYLYPEDPKALLDTLLRRYVESQVYQGVVENLASEQAARMVAMKAAV-----  
 \*\*\*\*\*

B

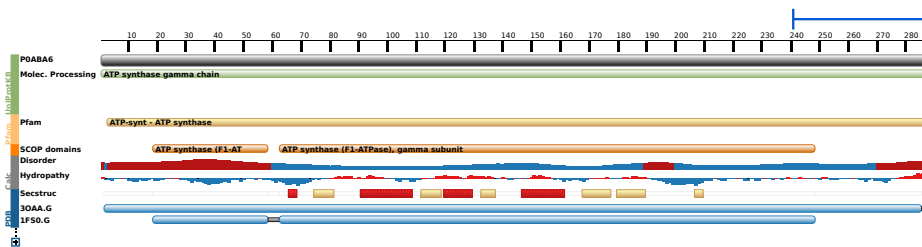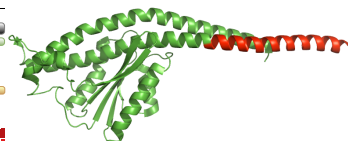

C

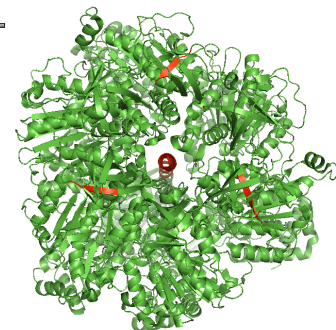

**Figure S12:**

**Residues A608 (A) and P610 (B) in *E. coli* FusA are well conserved across sequenced bacterial genomes.**

Frequency of occurrence of residues at the indicated position are plotted. NH indicates no-hit, - indicates residue deletion in the target genome and single letter codes for amino acids indicate the substituted residue at that position. Residues indicated in red are the mutated residues seen in our study.

A608 Conservation across genomes

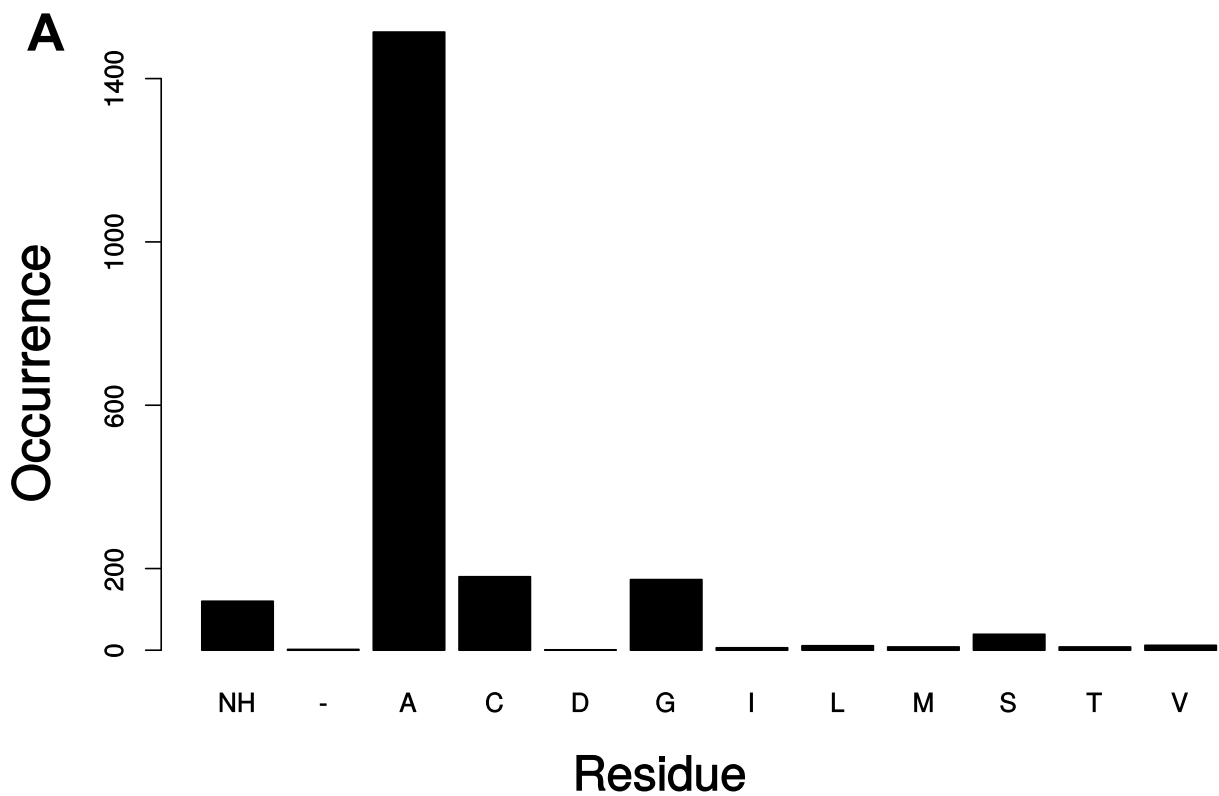

P610 Conservation across genomes

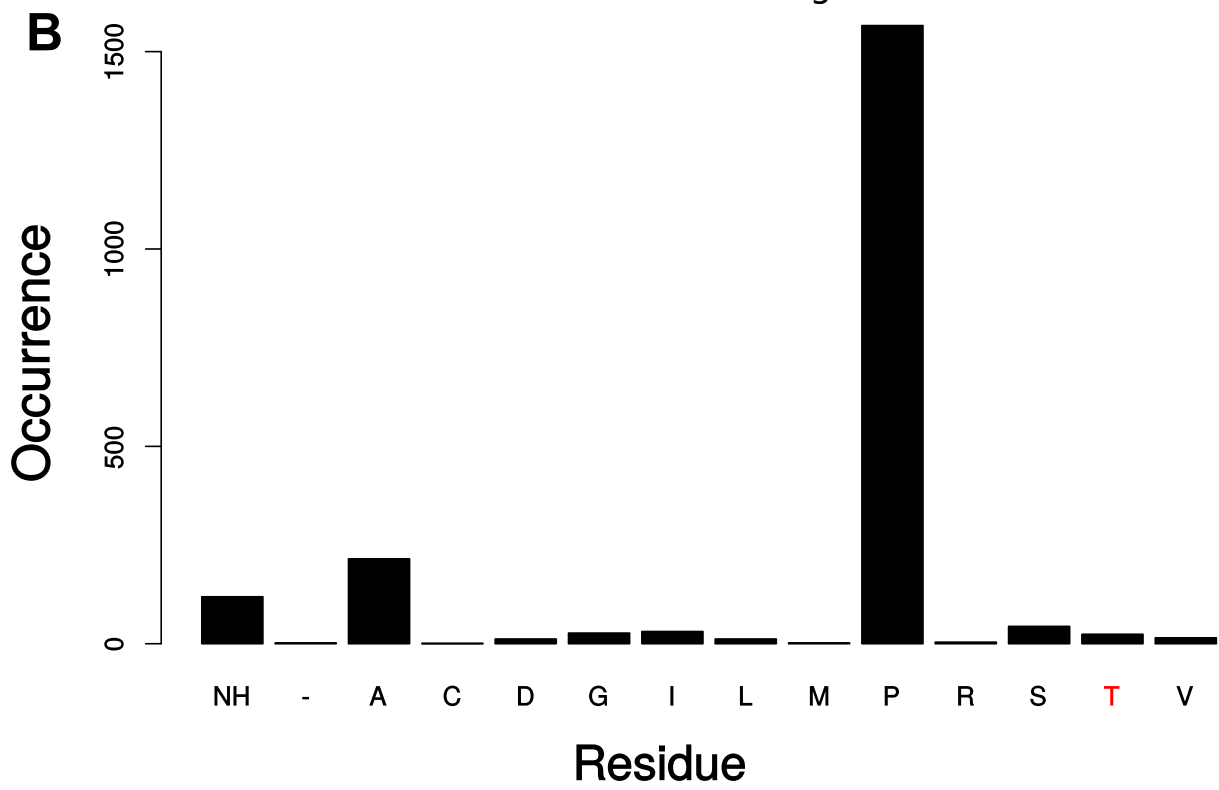

**Figure S13:****Resistance of the FusA<sup>P610T</sup> mutation across a panel of aminoglycosides.**

We studied the tolerance of FusA<sup>P610T</sup> mutation to different aminoglycosides, representing streptomycin-containing and 2-DOS-containing groups – using the FusA<sup>P610T</sup>-FRT strain. In this regard, streptomycin (streptomycin group); and kanamycin, gentamicin, neomycin, paromomycin, apramycin and hygromycin (2-DOS group) were tested. The 2-DOS aminoglycosides tested can further be subdivided as 4,5-disubstituted (neomycin, paromomycin, apramycin and hygromycin) and 4,6-disubstituted (kanamycin and gentamicin) 2-DOS derivatives. All the tested aminoglycosides, with the exception of apramycin and hygromycin, are paromomine derivatives. The FusA<sup>P610T</sup> strain tolerates all 2-DOS aminoglycosides (A and B), but does not tolerate streptomycin (C; black bars indicate wildtype with FRT site near *fusA* and red bars indicate FusA<sup>P610T</sup>-FRT strain; error bars indicate standard deviation of 8 replicates). The approximate fold tolerances are: 3-fold for kanamycin, neomycin and paromomycin, less than 2-fold for gentamicin, 2-fold for hygromycin and 5-fold for apramycin. The MIC changes in the FusA<sup>P610T</sup> mutant are in line with the explanation that translocation blockade of ribosomes is the basis for the bactericidal action of the 2-DOS aminoglycosides<sup>1</sup>. Apramycin and hygromycin have an unusual fused ring structure. While the fused ring aminoglycosides like apramycin do not cause miscoding and mainly affect translocation, the other 2-DOS aminoglycosides induce miscoding along with translocation blockade<sup>1</sup>. Also, paromomycin has a stronger inhibitory effect on the translocation of ribosomes on the first codon whereas gentamicin disrupts translocation across all codons<sup>1</sup>; most likely this is reflected in the lower MICs of gentamicin. On the other hand, the fold increase in resistance provided by the FusA<sup>P610T</sup> mutation is greater for paromomycin than gentamicin. Between gentamicin and paromomycin, inhibition of the pre-translocational state is greater in the case of gentamicin<sup>1</sup> (consider Figures 2E & F in this reference). Assuming that the FusA<sup>P610T</sup> mutation reverses resistance via its action on ribosomes blocked in the post-translocation step, the lower fold change in case of gentamicin makes sense. Streptomycin, however, binds to a region distinct but nearby to that bound by the 2-DOS aminoglycosides, and by a different mechanism induces miscoding<sup>2</sup>.

**A**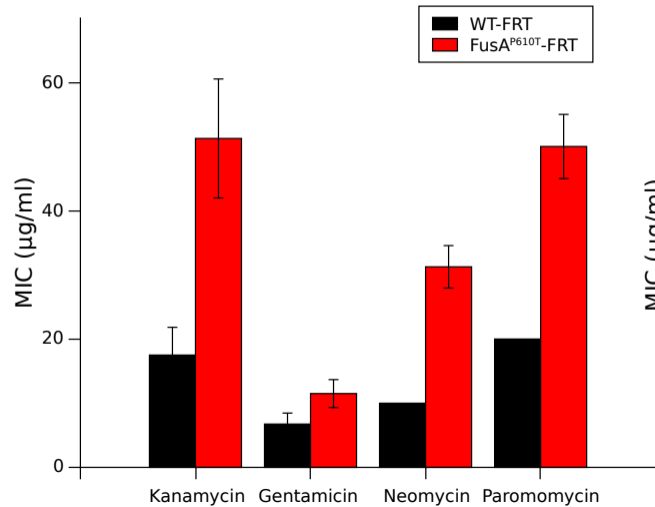**B**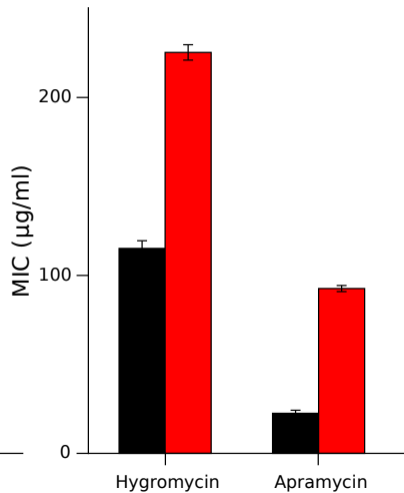**C**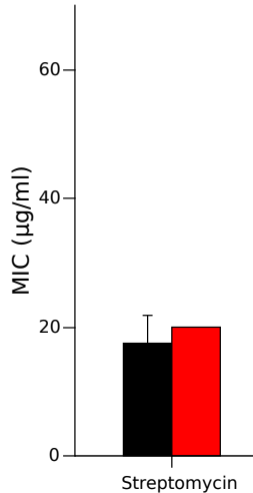

**Figure S14:**

**Temperature sensitive mutation in RRF does not interact with the kanamycin tolerance conferring mutation in *fusA*.**

EF-G, along with the ribosome recycling factor (RRF), assists in dissociation of stop codon stalled ribosome complexes<sup>3</sup>. 2-DOS aminoglycosides, apart from inducing mistranslation and translocation blockade, could also affect ribosome recycling. We checked for rescue of a temperature sensitive mutation in the ribosome recycling factor (RRF, *frr<sup>ts</sup>*), by the P610T mutation in *fusA*. The *frr<sup>ts</sup>* allele was transferred into the *FusA<sup>P610T</sup>* strain from LJ14<sup>3</sup> using P1 transduction. Though it is not clear that the temperature sensitive mutation in RRF has anything to do with aminoglycoside activity, our data show that this RRF residue and the P610 mutation in EF-G are probably uncoupled. This figure shows kanamycin MIC curves (3 replicates), with incubation temperature mentioned above (34°: non-restrictive temperature, 37°: slightly restrictive temperature and 42°C: restrictive temperature; error bars are standard deviation from three replicates).

34°C

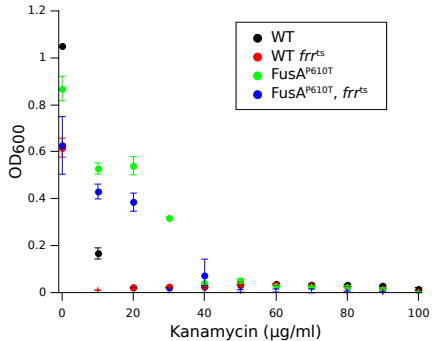

37°C

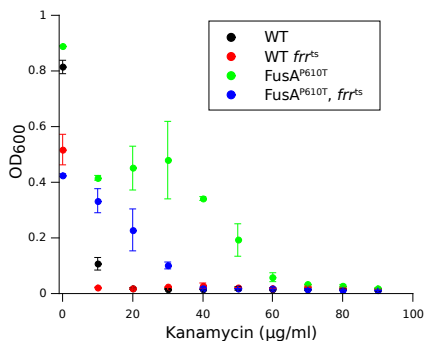

42°C

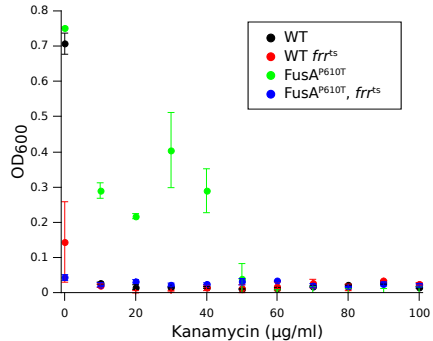

**Figure S15:**

**Tolerance characteristics of the ATP Synthase mutants.**

(A) Normalised MIC curves ( $N = OD_{conc. [C]} / OD_{conc. [0]}$ ) of *wildtype* (WT-FRT, black), *FusA<sup>P610T</sup>*-FRT (red) and *atpGΔ108bp* (green).  $OD_{600}$  for all concentrations is plotted as a ratio to the  $OD_{600}$  at 0-kan. As was indicated in Figure S7, the growth of the ATP synthase mutants declines gradually with increasing kanamycin concentrations in comparison with either the *wildtype* or the *FusA<sup>P610T</sup>* mutant. (B) Actual MIC curves for comparison (error bars indicate standard deviation of 8-replicates).

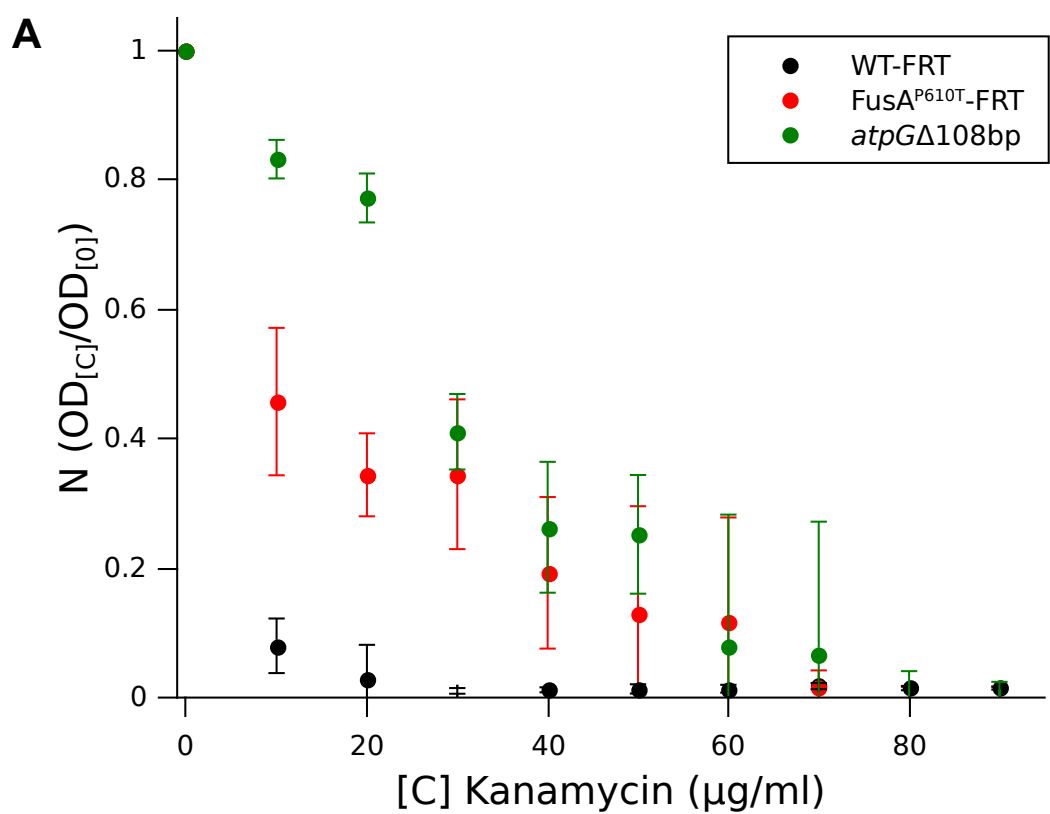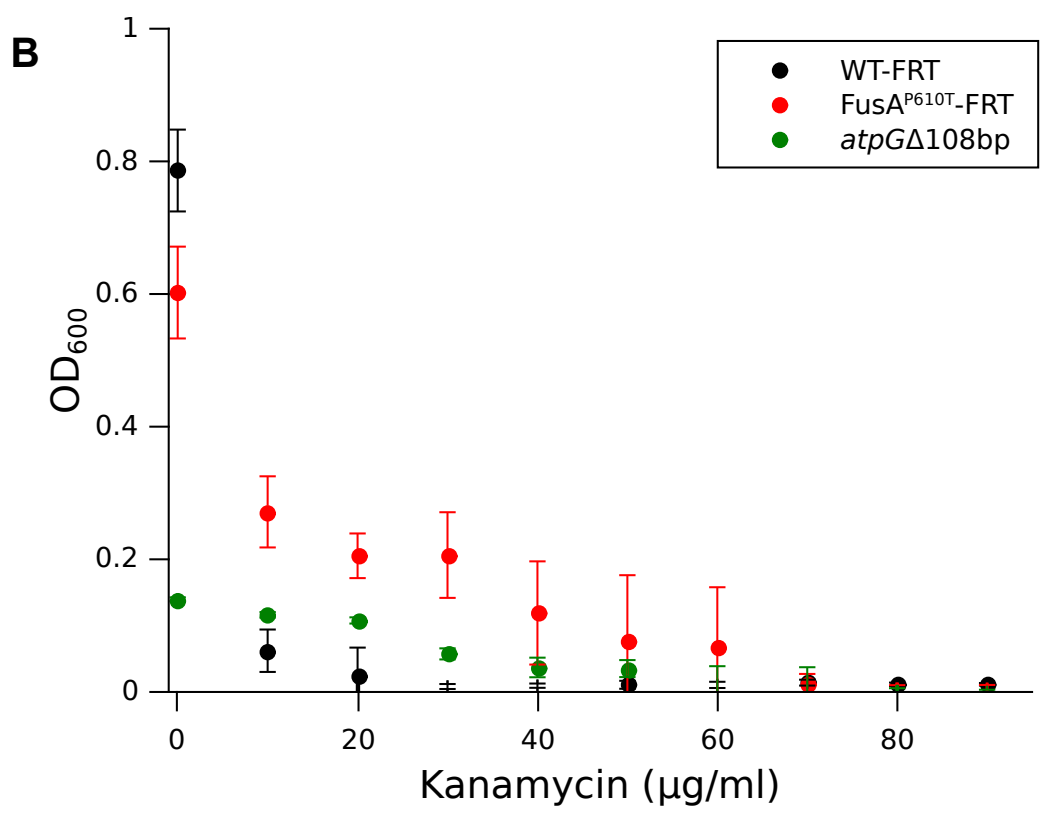

## References:

1. Tsai, A., Uemura, S., Johansson, M., et al. 2013, The impact of aminoglycosides on the dynamics of translation elongation. *Cell Rep.*, **3**, 497–508.
2. Demirci, H., Murphy, F., 4th, Murphy, E., Gregory, S. T., Dahlberg, A. E., and Jogl, G. 2013, A structural basis for streptomycin-induced misreading of the genetic code. *Nat. Commun.*, **4**, 1355.
3. Rao, A. R., and Varshney, U. 2001, Specific interaction between the ribosome recycling factor and the elongation factor G from *Mycobacterium tuberculosis* mediates peptidyl-tRNA release and ribosome recycling in *Escherichia coli*. *EMBO J.*, **20**, 2977–86.

**Table S1: List of mutations in 4-kan populations**

| Gene     | Description                                                                                                          | Coordinate | Mutation | Change in residue        | References     |
|----------|----------------------------------------------------------------------------------------------------------------------|------------|----------|--------------------------|----------------|
| acrE →   | Component of: AcrEF-TolC multidrug efflux transport system (mutation is in C-terminal region essential for function) | 3412886    | G→T      | R334L (CGC→CTC)          | <sup>1</sup>   |
| fusA ←   | Translational elongation factor – G, catalyses translocation. Mutations known to give kanamycin resistance.          | 3469709    | G→T      | P610T (CCA→ACA)          | <sup>2,3</sup> |
| rho/wecA | transcription termination factor/UDP-GlcNAc:undecaprenylphosphate GlcNAc-1-phosphate transferase                     | 3965775    | G→T      | intergenic (+76/-164)    |                |
| rrlA     | 23S ribosomal RNA of rrnA operon                                                                                     | 4037405    | T→C      | noncoding (1864/2905 nt) |                |
| rrlA     | 23S ribosomal RNA of rrnA operon                                                                                     | 4037438    | G→A      | noncoding (1897/2905 nt) |                |
| cpxA ←   | Sensory histidine kinase                                                                                             | 4102346    | A→T      | F218Y (TTC→TAC)          | <sup>4,5</sup> |

**References:**

1. Ge, Q., Yamada, Y., and Zgurskaya, H. 2009, The C-terminal domain of AcrA is essential for the assembly and function of the multidrug efflux pump AcrAB-TolC. *J. Bacteriol.*, **191**, 4365–71.
2. Hou, Y., Lin, Y. P., Sharer, J. D., and March, P. E. 1994, In vivo selection of conditional-lethal mutations in the gene encoding elongation factor G of Escherichia coli. *J. Bacteriol.*, **176**, 123–9.
3. Lázár, V., Pal Singh, G., Spohn, R., et al. 2013, Bacterial evolution of antibiotic hypersensitivity. *Mol. Syst. Biol.*, **9**, 700.
4. Kohanski, M. A., Dwyer, D. J., Hayete, B., Lawrence, C. A., and Collins, J. J. 2007, A common mechanism of cellular death induced by bactericidal antibiotics. *Cell*, **130**, 797–810.
5. Mahoney, T. F., and Silhavy, T. J. 2013, The Cpx stress response confers resistance to some, but not all, bactericidal antibiotics. *J. Bacteriol.*, **195**, 1869–74.

**Table S2: Coverages of ribosomal genes.**

*E. coli* has seven genes coding for 16S-rRNA (*rrsA-E, G-H*). Each gene is 1541 nucleotides long.

In the following table:

(A) Total number of reads mapping to any of the seven 16S-rRNA genes.

(B) Average coverage per gene (averaged across all *E. coli* genes) in the sample.

The last column represents fold change in coverage per 16S-rRNA gene. This value is obtained by first normalising the number of reads mapping to *rrs* (A) by the length of the gene (1541). Next to get fold change in coverage, this value was divided by the average coverage per gene obtained in that sample (B). Since there are 7 copies of the gene, this fold change in coverage seen is around 7. This value is then divided by 7 to get fold change in coverage per *rrs* gene.

| 4-kan        | Reads mapping to <i>rrs</i> (A) | Average coverage per gene (B) | Fold change in coverage per <i>rrs</i> gene |
|--------------|---------------------------------|-------------------------------|---------------------------------------------|
| 15 hrs rep 1 | 4328172                         | 358.074596286                 | 1.1205476302                                |
| 15 hrs rep 2 | 2946609                         | 253.2221948134                | 1.078748149                                 |
| 17 hrs rep 1 | 1966994                         | 172.5495069428                | 1.0567898509                                |
| 17 hrs rep 2 | 2975612                         | 252.3331805142                | 1.093204123                                 |
| 19 hrs rep 1 | 2127600                         | 191.9892368062                | 1.0273357959                                |
| 19 hrs rep 2 | 2867358                         | 247.2703063478                | 1.0750020042                                |
| 21 hrs rep 1 | 3053929                         | 268.7193309623                | 1.0535601798                                |
| 21 hrs rep 2 | 3819714                         | 335.4467956667                | 1.0556173511                                |
| 23 hrs rep 1 | 1345196                         | 118.3240212752                | 1.0539304874                                |
| 23 hrs rep 2 | 2609927                         | 228.7284257846                | 1.0578096888                                |
| AP1 rep 1    | 3803828                         | 340.9780289431                | 1.0341744315                                |
| AP1 rep 2    | 7128459                         | 612.7730107729                | 1.0784384127                                |
| AP2 rep 1    | 1415075                         | 125.5188404904                | 1.0451289094                                |
| AP2 rep 2    | 4192742                         | 364.2996081998                | 1.0669369506                                |
| AP3 rep 1    | 838881                          | 75.4764077531                 | 1.0303587352                                |
| AP3 rep 2    | 2176118                         | 192.7329414183                | 1.0467086497                                |
| AP4 rep 1    | 5430735                         | 494.0638787656                | 1.0190015134                                |
| AP4 rep 2    | 5325788                         | 471.4735725556                | 1.047190857                                 |
| AP5 rep 1    | 5090948                         | 444.3785432428                | 1.0620498488                                |
| AP5 rep 2    | 7942073                         | 710.0356862169                | 1.0369385467                                |
| 0-kan        |                                 |                               |                                             |
| ME rep 1     | 2233130                         | 186.8217641047                | 1.1081176148                                |
| ME rep 2     | 3713898                         | 311.7248486099                | 1.1044800368                                |
| S rep 1      | 2025765                         | 191.2235514425                | 0.9820803124                                |
| S rep 2      | 1444688                         | 131.0959766049                | 1.0216073845                                |
| P1 rep 1     | 4263156                         | 382.7242154302                | 1.0326296831                                |
| P1 rep 2     | 4967070                         | 444.5640670606                | 1.0357745716                                |
| P2 rep 1     | 5489457                         | 502.0420141363                | 1.013651449                                 |
| P2 rep 2     | 2876456                         | 259.0702581753                | 1.029294136                                 |
| P3 rep 1     | 3747570                         | 337.0892387021                | 1.0306333384                                |
| P3 rep 2     | 3286313                         | 301.5926336141                | 1.0101538336                                |
| P4 rep 1     | 2545997                         | 241.0281552775                | 0.9792406465                                |
| P4 rep 2     | 4334384                         | 389.5779183791                | 1.0314124588                                |
| P5 rep 1     | 2638934                         | 236.9938573594                | 1.0322639489                                |
| P5 rep 2     | 1728135                         | 155.9198716319                | 1.0274850671                                |
| 8-kan P0     |                                 |                               |                                             |
| B            | 2869601                         | 257.6083331969                | 1.0326684975                                |
| C            | 2886637                         | 258.8755684399                | 1.0337140752                                |
| D            | 3319891                         | 282.1778552119                | 1.0906872043                                |
| E            | 4442635                         | 394.692320105                 | 1.0434731511                                |
| F            | 2986720                         | 269.3013403418                | 1.0281472458                                |
| G            | 2911581                         | 266.2388294082                | 1.0138105418                                |
| H            | 3286277                         | 276.0285148477                | 1.103696181                                 |
| I            | 3176409                         | 283.1969818073                | 1.0397935488                                |
| J            | 3441525                         | 318.8505551472                | 1.0006059303                                |
| K            | 3578291                         | 328.4007161674                | 1.010115143                                 |

|          |         |                |              |
|----------|---------|----------------|--------------|
| L        | 2950641 | 256.5608602282 | 1.0661671346 |
| 8-kan P1 |         |                |              |
| N        | 1954659 | 234.2548515055 | 0.773538138  |
| O        | 2903762 | 258.9025566759 | 1.0397381987 |
| P        | 2840254 | 260.671702661  | 1.0100959103 |
| Q        | 3496998 | 339.2051491581 | 0.9557235089 |
| R        | 3033832 | 328.337603293  | 0.8565845273 |
| S        | 2181833 | 235.2818418959 | 0.859671276  |
| T        | 2322143 | 206.773604527  | 1.0411017662 |
| U        | 3217441 | 320.621504585  | 0.9302876707 |
| V        | 2439142 | 250.1907846603 | 0.9037849322 |
| W        | 2087809 | 188.5260461146 | 1.0266412909 |
| X        | 2540467 | 228.1923927085 | 1.0320760902 |
| 0-kan P0 |         |                |              |
| A        | 4605034 | 418.139792255  | 1.020964551  |
| 0-kan P1 |         |                |              |
| M        | 3629029 | 336.5745277759 | 0.9995591863 |

**Table S3: List of mutations in isolates from 8-kan populations**

| Gene            | Description                                                                                                          | Coordinate | Mutation | Change in residue       |                |
|-----------------|----------------------------------------------------------------------------------------------------------------------|------------|----------|-------------------------|----------------|
| yajG ←          |                                                                                                                      | 453005     | G→T      | I129I (ATC→ATA)         |                |
| ybfQ → / → ybfL |                                                                                                                      | 736003     | A→G      | intergenic (+96/-45)    |                |
| topA →          | DNA topoisomerase I (ω protein)                                                                                      | 1329610    | C→T      | S180L (TCG→TTG)         |                |
| gatC            | Contains a PTS Enzyme IIC domain. (Insertion similar to the one seen in Freddolino PL et. al. 2012)                  | 2171384    | .→C      | coding (917/1356 nt)    | <sup>1</sup>   |
| yfiP →          |                                                                                                                      | 2717619    | A→T      | P125P (CCA→CCT)         |                |
| rpoD →          | RNA polymerase sigma 70                                                                                              | 3211850    | T→A      | L261Q (CTG→CAG)         |                |
| acrE →          | Component of: AcrEF-TolC multidrug efflux transport system (mutation is in C-terminal region essential for function) | 3412886    | G→T      | R334L (CGC→CTC)         | <sup>2</sup>   |
| fusA ←          | Translational elongation factor – G, catalyses translocation. Mutations known to give kanamycin resistance.          | 3469708    | G→A      | P610L (CCA→CTA)         | <sup>3,4</sup> |
| fusA ←          | Translational elongation factor – G, catalyses translocation. Mutations known to give kanamycin resistance.          | 3469714    | G→T      | A608E (GCG→GAG)         | <sup>3,4</sup> |
| yhgA →          |                                                                                                                      | 3541595    | G→A      | W136* (TGG→TAG)         |                |
| atpG ←          | Gamma subunit ATP synthase F1 complex                                                                                | 3915437    | Δ108 bp  | coding (745-852/864 nt) | <sup>4</sup>   |
| atpG ←          | Gamma subunit ATP synthase F1 complex                                                                                | 3915527    | Δ28 bp   | coding (735-762/864 nt) | <sup>4</sup>   |
| atpG ←          | Gamma subunit ATP synthase F1 complex                                                                                | 3915566    | Δ1 bp    | coding (723/864 nt)     | <sup>4</sup>   |

|        |                                                                   |         |        |                          |                |
|--------|-------------------------------------------------------------------|---------|--------|--------------------------|----------------|
| atpA ← | Alpha subunit ATP synthase<br>F1 complex                          | 3917692 | Δ15 bp | coding (175-189/1542 nt) | <sup>4</sup>   |
| cyaA → | Adenylate cyclase                                                 | 3990973 | A→T    | N600Y (AAC→TAC)          |                |
| cpxA ← | Sensory histidine kinase                                          | 4102346 | A→T    | F218Y (TTC→TAC)          | <sup>5,6</sup> |
| oxyR → | Bifunctional regulatory<br>protein sensor for oxidative<br>stress | 4157045 | G→T    | R178L (CGC→CTC)          |                |

## References:

1. Freddolino, P. L., Amini, S., and Tavazoie, S. 2012, Newly identified genetic variations in common Escherichia coli MG1655 stock cultures. *J. Bacteriol.*, **194**, 303–6.
2. Ge, Q., Yamada, Y., and Zgurskaya, H. 2009, The C-terminal domain of AcrA is essential for the assembly and function of the multidrug efflux pump AcrAB-TolC. *J. Bacteriol.*, **191**, 4365–71.
3. Hou, Y., Lin, Y. P., Sharer, J. D., and March, P. E. 1994, In vivo selection of conditional-lethal mutations in the gene encoding elongation factor G of Escherichia coli. *J. Bacteriol.*, **176**, 123–9.
4. Lázár, V., Pal Singh, G., Spohn, R., et al. 2013, Bacterial evolution of antibiotic hypersensitivity. *Mol. Syst. Biol.*, **9**, 700.
5. Kohanski, M. A., Dwyer, D. J., Hayete, B., Lawrence, C. A., and Collins, J. J. 2007, A common mechanism of cellular death induced by bactericidal antibiotics. *Cell*, **130**, 797–810.
6. Mahoney, T. F., and Silhavy, T. J. 2013, The Cpx stress response confers resistance to some, but not all, bactericidal antibiotics. *J. Bacteriol.*, **195**, 1869–74.
